# Supplementary material for: Unexpectedly strong Xe binding by host–guest interaction
Source: Royal Society of Chemistry journal article supplement (doi:10.1039/c9cp05562b), 2019-01-01
Supplement: c9cp05562b1.pdf [file c9cp05562b1.pdf]

## Electronic Supplementary Information

### Unexpectedly Strong Xe Binding by Host-Guest Interaction

Junjian Miao,<sup>a,b,†</sup> Zhenhai Xiong<sup>a,b,†</sup> and Yi Gao<sup>\*c</sup>

<sup>a</sup> *College of Food Science and Technology, Shanghai Ocean University, No. 999 Hucheng Huan Road, LinGang New City, Shanghai 201306, PR China.*

<sup>b</sup> *Laboratory of Quality and Safety Risk Assessment for Aquatic Products on Storage and Preservation (Shanghai), Ministry of Agriculture, Shanghai 201306, PR China.*

<sup>c</sup> *Zhangjiang Laboratory, Shanghai Advanced Research Institute, Chinese Academy of Sciences, Shanghai 201210, PR China.*

Table of Contents

|                           |        |
|---------------------------|--------|
| Supplementary Figures     | pp2-3  |
| Supplementary Table       | pp4-6  |
| The optimized coordinates | pp7-12 |

**Supplementary Figures (Figure S1 to Figure S3)**

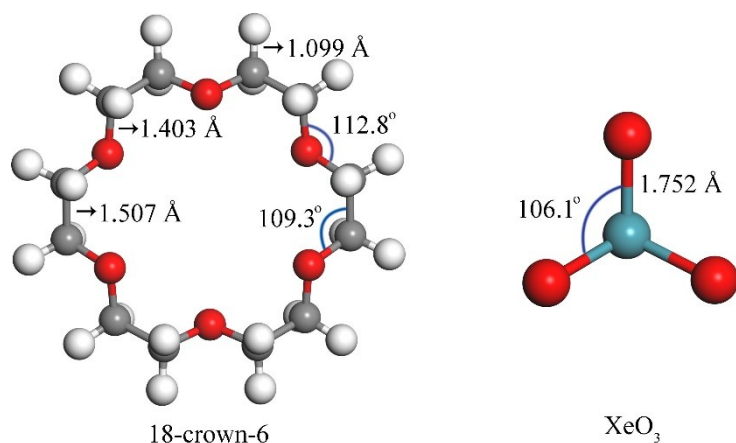

**Figure S1.** Optimized geometries and key structural parameters of 18-crown-6 and XeO<sub>3</sub> at M06-2X/def2-TZVPP level.

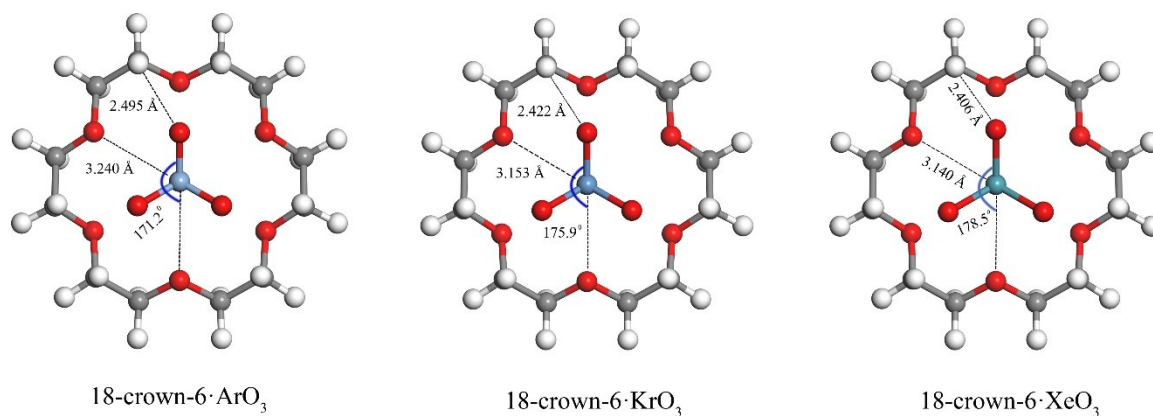

**Figure S2.** Several key parameters showing the change of the binding between host and guest for the optimized geometries of 18-crown-6·ArO<sub>3</sub>, 18-crown-6·KrO<sub>3</sub> and 18-crown-6·XeO<sub>3</sub> at M06-2X/aug-cc-pVTZ-pp level of theory.

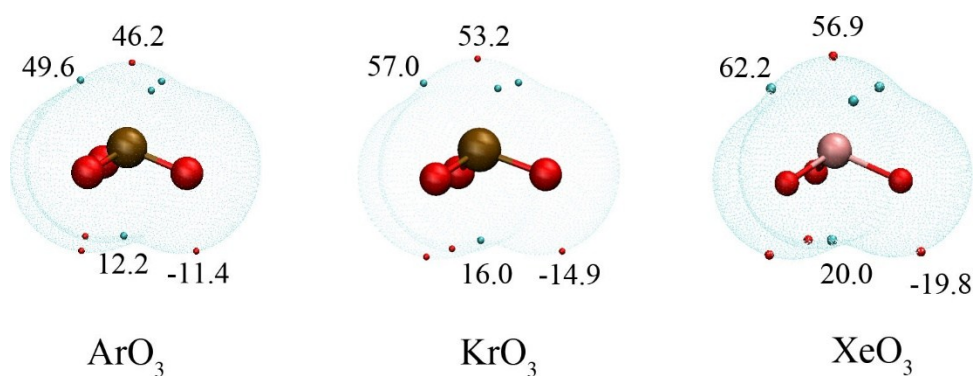

**Figure S3.** The distribution of minima and maxima of molecular electrostatic potential on vdW isosurfaces (isovalue = 0.001 a.u.) for ArO<sub>3</sub>, KrO<sub>3</sub> and XeO<sub>3</sub> calculated at M06-2X/aug-cc-pVTZ-pp level of theory. Unit for numeric values on the isosurface is kcal mol<sup>-1</sup>. Small red spheres, minima; small cyan spheres, maxima.

## Supplementary Table

**Table S1.**  $\delta g$  (unit: a.u.) of some atom pairs in 18-crown-6·XeO<sub>3</sub> calculated at M06-2X/aug-cc-pVTZ-pp level of theory and the corresponding geometry with atomic labels.

| Atom index | Atom index | $\delta g$ |
|------------|------------|------------|
| 3          | 43         | 0.161      |
| 1          | 43         | 0.161      |
| 24         | 43         | 0.160      |
| 25         | 43         | 0.096      |
| 23         | 43         | 0.095      |
| 2          | 43         | 0.096      |
| 33         | 44         | 0.090      |
| 31         | 44         | 0.090      |
| 15         | 46         | 0.091      |
| 17         | 46         | 0.092      |
| 40         | 45         | 0.090      |
| 22         | 45         | 0.091      |
| 27         | 44         | 0.077      |
| 7          | 46         | 0.077      |
| 27         | 43         | 0.074      |
| 7          | 43         | 0.074      |
| 4          | 44         | 0.072      |
| 8          | 46         | 0.072      |
| 10         | 43         | 0.071      |
| 30         | 43         | 0.071      |
| 10         | 45         | 0.071      |
| 30         | 45         | 0.071      |
| 25         | 45         | 0.071      |

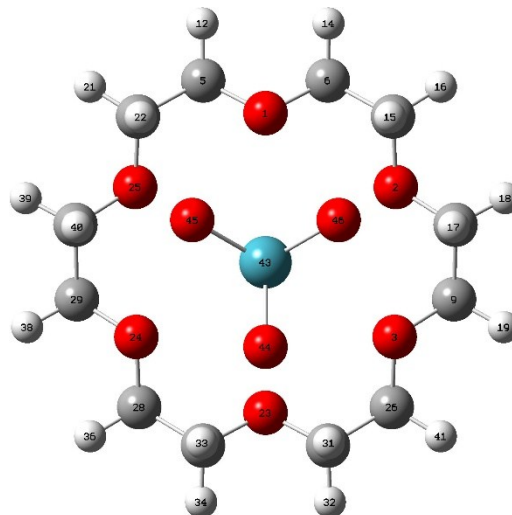

**Table S2.**  $\delta g$  (unit: a.u.) of some atom pairs in 18-crown-6·KrO<sub>3</sub> calculated at M06-2X/aug-cc-pVTZ-pp level of theory and the corresponding geometry with atomic labels.

| Atom index | Atom index | $\delta g$ |
|------------|------------|------------|
| 1          | 29         | 0.111      |
| 3          | 45         | 0.103      |
| 4          | 25         | 0.103      |
| 1          | 5          | 0.100      |
| 1          | 15         | 0.100      |
| 3          | 39         | 0.091      |
| 4          | 32         | 0.091      |
| 2          | 11         | 0.089      |
| 2          | 18         | 0.089      |
| 3          | 41         | 0.079      |
| 4          | 21         | 0.079      |
| 4          | 27         | 0.073      |
| 3          | 35         | 0.073      |
| 2          | 8          | 0.073      |
| 2          | 13         | 0.073      |
| 2          | 7          | 0.073      |
| 3          | 36         | 0.071      |
| 4          | 22         | 0.071      |

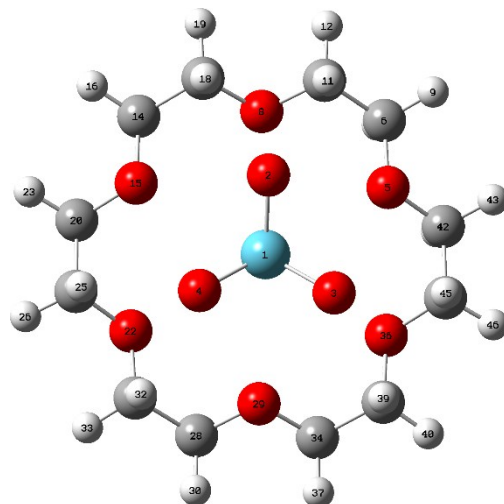

**Table S3.**  $\delta g$  (unit: a.u.) of some atom pairs in 18-crown-6 $\cdot$ ArO<sub>3</sub> calculated at M06-2X/aug-cc-pVTZ-pp level of theory and the corresponding geometry with atomic labels.

| Atom index | Atom index | $\delta g$ |
|------------|------------|------------|
| 3          | 45         | 0.092      |
| 4          | 25         | 0.092      |
| 4          | 32         | 0.081      |
| 3          | 39         | 0.081      |
| 2          | 11         | 0.080      |
| 2          | 18         | 0.080      |
| 3          | 41         | 0.070      |
| 4          | 21         | 0.070      |
| 1          | 29         | 0.070      |

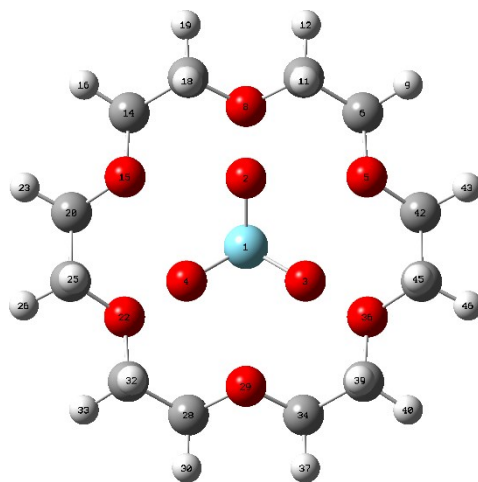

### The optimized coordinates for species under study

18-crown-6

|   |           |           |           |
|---|-----------|-----------|-----------|
| O | 2.169803  | -1.874039 | 0.258258  |
| O | -0.536936 | -2.814873 | -0.258957 |
| O | -2.706578 | -0.939928 | 0.257631  |
| C | -3.345408 | 1.345416  | 0.294912  |
| C | 3.345398  | -1.345422 | -0.294892 |
| C | 1.817467  | -3.113180 | -0.296631 |
| C | 0.508375  | -3.568707 | 0.294836  |
| C | -1.786180 | -3.127638 | 0.296755  |
| C | -2.835274 | -2.222460 | -0.295607 |
| C | 3.604670  | 0.016128  | 0.296754  |
| H | 3.251038  | -1.253124 | -1.384041 |
| H | 4.197665  | -2.005191 | -0.079097 |
| H | 1.711613  | -3.031643 | -1.385589 |
| H | 2.594333  | -3.860760 | -0.082581 |
| H | 0.541043  | -3.440494 | 1.383929  |
| H | 0.363058  | -4.636750 | 0.079415  |
| H | -1.767966 | -2.993809 | 1.385534  |
| H | -2.045660 | -4.174528 | 0.084516  |
| H | -3.832744 | -2.631377 | -0.080832 |
| H | -2.707509 | -2.187017 | -1.384684 |
| H | 4.640144  | 0.315948  | 0.081951  |
| H | 3.482069  | -0.034920 | 1.385817  |
| O | -2.169811 | 1.874032  | -0.258233 |
| O | 0.536927  | 2.814865  | 0.258986  |
| O | 2.706569  | 0.939922  | -0.257606 |
| C | -3.604677 | -0.016135 | -0.296733 |
| C | -1.817475 | 3.113172  | 0.296659  |
| C | -0.508383 | 3.568701  | -0.294805 |
| C | 1.786172  | 3.127633  | -0.296722 |
| C | 2.835265  | 2.222452  | 0.295636  |
| H | -3.251053 | 1.253119  | 1.384062  |
| H | -4.197674 | 2.005184  | 0.079113  |
| H | -1.711624 | 3.031633  | 1.385617  |
| H | -2.594341 | 3.860753  | 0.082609  |
| H | -0.541050 | 3.440493  | -1.383898 |
| H | -0.363066 | 4.636744  | -0.079379 |
| H | 1.767959  | 2.993808  | -1.385503 |
| H | 2.045651  | 4.174522  | -0.084479 |

|   |           |           |           |
|---|-----------|-----------|-----------|
| H | 3.832735  | 2.631370  | 0.080862  |
| H | 2.707501  | 2.187006  | 1.384713  |
| H | -4.640152 | -0.315955 | -0.081935 |
| H | -3.482071 | 0.034912  | -1.385797 |

XeO<sub>3</sub>

|    |           |           |           |
|----|-----------|-----------|-----------|
| Xe | 0.000000  | 0.000000  | 0.207721  |
| O  | 0.000000  | 1.616918  | -0.467373 |
| O  | 1.400292  | -0.808459 | -0.467373 |
| O  | -1.400292 | -0.808459 | -0.467373 |

KrO<sub>3</sub>

|    |           |           |           |
|----|-----------|-----------|-----------|
| Kr | -4.142822 | -2.032789 | -0.591526 |
| O  | -2.779261 | -1.359544 | -0.016992 |
| O  | -4.238632 | -3.550598 | -0.017150 |
| O  | -5.406183 | -1.191106 | -0.010515 |

ArO<sub>3</sub>

|    |           |           |          |
|----|-----------|-----------|----------|
| Ar | 0.000000  | 0.000000  | 1.444353 |
| O  | 0.000000  | 1.395771  | 1.933563 |
| O  | 1.208773  | -0.697885 | 1.933563 |
| O  | -1.208773 | -0.697885 | 1.933563 |

18-crown-6·XeO<sub>3</sub>

|   |           |           |           |
|---|-----------|-----------|-----------|
| O | -2.409647 | -1.391210 | 0.099853  |
| O | -2.430795 | 1.403420  | -0.341834 |
| O | -0.000000 | 2.782421  | 0.099853  |
| C | 2.378840  | 2.719382  | 0.152853  |
| C | -2.356428 | -2.702352 | -0.414072 |
| C | -3.518520 | -0.689550 | -0.414072 |
| C | -3.544474 | 0.700445  | 0.152853  |
| C | -2.378840 | 2.719382  | 0.152853  |
| C | -1.162092 | 3.391903  | -0.414072 |
| C | -1.165634 | -3.419827 | 0.152853  |
| H | -2.283363 | -2.670662 | -1.507962 |
| H | -3.270883 | -3.245662 | -0.144582 |
| H | -3.454543 | -0.642120 | -1.507962 |
| H | -4.446267 | -1.209837 | -0.144582 |
| H | -3.510693 | 0.661599  | 1.245807  |
| H | -4.473745 | 1.196279  | -0.158164 |
| H | -2.328308 | 2.709549  | 1.245807  |
| H | -3.272880 | 3.276238  | -0.158164 |
| H | -1.175384 | 4.455499  | -0.144582 |
| H | -1.171179 | 3.312782  | -1.507962 |



|    |           |           |           |
|----|-----------|-----------|-----------|
| H  | -1.200865 | -4.472516 | -0.158164 |
| H  | -1.182384 | -3.371149 | 1.245807  |
| O  | 2.430795  | 1.403420  | -0.341834 |
| O  | 2.409647  | -1.391210 | 0.099853  |
| O  | 0.000000  | -2.806840 | -0.341834 |
| C  | 1.162092  | 3.391903  | -0.414072 |
| C  | 3.544474  | 0.700445  | 0.152853  |
| C  | 3.518520  | -0.689550 | -0.414072 |
| C  | 2.356428  | -2.702352 | -0.414072 |
| C  | 1.165634  | -3.419827 | 0.152853  |
| H  | 2.328308  | 2.709549  | 1.245807  |
| H  | 3.272880  | 3.276238  | -0.158164 |
| H  | 3.510693  | 0.661599  | 1.245807  |
| H  | 4.473745  | 1.196279  | -0.158164 |
| H  | 3.454543  | -0.642120 | -1.507962 |
| H  | 4.446267  | -1.209837 | -0.144582 |
| H  | 2.283363  | -2.670662 | -1.507962 |
| H  | 3.270883  | -3.245662 | -0.144582 |
| H  | 1.200865  | -4.472516 | -0.158164 |
| H  | 1.182384  | -3.371149 | 1.245807  |
| H  | 1.175384  | 4.455499  | -0.144582 |
| H  | 1.171179  | 3.312782  | -1.507962 |
| Xe | 0.000000  | -0.000000 | 1.554864  |
| O  | 1.364834  | 0.787987  | 2.325957  |
| O  | 0.000000  | -1.575974 | 2.325957  |
| O  | -1.364834 | 0.787987  | 2.325957  |

18-crown-6·KrO<sub>3</sub>

|    |           |           |           |
|----|-----------|-----------|-----------|
| Kr | 0.000000  | 0.000000  | 1.126325  |
| O  | 0.000000  | 1.490804  | 1.777821  |
| O  | 1.291075  | -0.745402 | 1.777821  |
| O  | -1.291075 | -0.745402 | 1.777821  |
| O  | 2.417865  | 1.395955  | -0.338469 |
| C  | 2.359427  | 2.702755  | -0.858396 |
| C  | 1.166680  | 3.424989  | -0.297447 |
| O  | 0.000000  | 2.833723  | -0.809587 |
| H  | 3.272039  | 3.252159  | -0.592954 |
| H  | 2.285490  | 2.668279  | -1.952145 |
| H  | 1.175772  | 3.365746  | 0.795479  |
| H  | 1.218472  | 4.481910  | -0.592327 |
| C  | -1.166680 | 3.424989  | -0.297447 |
| C  | -2.359427 | 2.702755  | -0.858396 |
| O  | -2.417865 | 1.395955  | -0.338469 |
| H  | -3.272039 | 3.252159  | -0.592954 |

|   |           |           |           |
|---|-----------|-----------|-----------|
| H | -2.285490 | 2.668279  | -1.952145 |
| H | -1.175772 | 3.365746  | 0.795479  |
| H | -1.218472 | 4.481910  | -0.592327 |
| C | -3.520368 | 0.691946  | -0.858396 |
| C | -3.549468 | -0.702120 | -0.297447 |
| O | -2.454076 | -1.416861 | -0.809587 |
| H | -4.452471 | 1.207590  | -0.592954 |
| H | -3.453543 | 0.645153  | -1.952145 |
| H | -3.502708 | -0.664624 | 0.795479  |
| H | -4.490684 | -1.185727 | -0.592327 |
| C | -2.382787 | -2.722869 | -0.297447 |
| C | -1.160942 | -3.394701 | -0.858396 |
| O | 0.000000  | -2.791910 | -0.338469 |
| H | -1.180432 | -4.459748 | -0.592954 |
| H | -1.168052 | -3.313432 | -1.952145 |
| H | -2.326936 | -2.701122 | 0.795479  |
| H | -3.272212 | -3.296183 | -0.592327 |
| C | 1.160942  | -3.394701 | -0.858396 |
| C | 2.382787  | -2.722869 | -0.297447 |
| O | 2.454076  | -1.416861 | -0.809587 |
| H | 1.180432  | -4.459748 | -0.592954 |
| H | 1.168052  | -3.313432 | -1.952145 |
| H | 2.326936  | -2.701122 | 0.795479  |
| H | 3.272212  | -3.296183 | -0.592327 |
| C | 3.549468  | -0.702120 | -0.297447 |
| C | 3.520368  | 0.691946  | -0.858396 |
| H | 4.452471  | 1.207590  | -0.592954 |
| H | 3.453543  | 0.645153  | -1.952145 |
| H | 3.502708  | -0.664624 | 0.795479  |
| H | 4.490684  | -1.185727 | -0.592327 |

18-crown-6·ArO<sub>3</sub>

|    |           |           |           |
|----|-----------|-----------|-----------|
| Ar | 0.000000  | 0.000000  | 1.417037  |
| O  | 0.000000  | 1.385257  | 1.942248  |
| O  | 1.199668  | -0.692629 | 1.942248  |
| O  | -1.199668 | -0.692629 | 1.942248  |
| O  | 2.440638  | 1.409103  | -0.182036 |
| C  | 2.361468  | 2.706205  | -0.718154 |
| C  | 1.167207  | 3.419309  | -0.145748 |
| O  | 0.000000  | 2.834673  | -0.661895 |
| H  | 3.272215  | 3.270582  | -0.476005 |
| H  | 2.267645  | 2.659439  | -1.810281 |
| H  | 1.181869  | 3.345455  | 0.947377  |
| H  | 1.215391  | 4.481563  | -0.423056 |

|   |           |           |           |
|---|-----------|-----------|-----------|
| C | -1.167207 | 3.419309  | -0.145748 |
| C | -2.361468 | 2.706205  | -0.718154 |
| O | -2.440638 | 1.409103  | -0.182036 |
| H | -3.272215 | 3.270582  | -0.476005 |
| H | -2.267645 | 2.659439  | -1.810281 |
| H | -1.181869 | 3.345455  | 0.947377  |
| H | -1.215391 | 4.481563  | -0.423056 |
| C | -3.524376 | 0.691989  | -0.718154 |
| C | -3.544812 | -0.698823 | -0.145748 |
| O | -2.454899 | -1.417337 | -0.661895 |
| H | -4.468515 | 1.198530  | -0.476005 |
| H | -3.436964 | 0.634118  | -1.810281 |
| H | -3.488184 | -0.649200 | 0.947377  |
| H | -4.488843 | -1.188222 | -0.423056 |
| C | -2.377605 | -2.720485 | -0.145748 |
| C | -1.162908 | -3.398194 | -0.718154 |
| O | 0.000000  | -2.818206 | -0.182036 |
| H | -1.196300 | -4.469112 | -0.476005 |
| H | -1.169319 | -3.293557 | -1.810281 |
| H | -2.306315 | -2.696256 | 0.947377  |
| H | -3.273452 | -3.293341 | -0.423056 |
| C | 1.162908  | -3.398194 | -0.718154 |
| C | 2.377605  | -2.720485 | -0.145748 |
| O | 2.454899  | -1.417337 | -0.661895 |
| H | 1.196300  | -4.469112 | -0.476005 |
| H | 1.169319  | -3.293557 | -1.810281 |
| H | 2.306315  | -2.696256 | 0.947377  |
| H | 3.273452  | -3.293341 | -0.423056 |
| C | 3.544812  | -0.698823 | -0.145748 |
| C | 3.524376  | 0.691989  | -0.718154 |
| H | 4.468515  | 1.198530  | -0.476005 |
| H | 3.436964  | 0.634118  | -1.810281 |
| H | 3.488184  | -0.649200 | 0.947377  |
| H | 4.488843  | -1.188222 | -0.423056 |

18-crown-6·XeO<sub>3</sub> (TS)

|   |           |           |           |
|---|-----------|-----------|-----------|
| O | -0.000000 | 2.758408  | -0.637646 |
| O | 2.344598  | 1.353654  | -0.752116 |
| O | 2.388852  | -1.379204 | -0.637646 |
| C | 1.177833  | -3.362605 | -0.339548 |
| C | -1.181731 | 3.385817  | -1.046115 |
| C | 1.181731  | 3.385817  | -1.046115 |
| C | 2.323185  | 2.701336  | -0.339548 |
| C | 3.501018  | 0.661269  | -0.339548 |

|    |           |           |           |
|----|-----------|-----------|-----------|
| C  | 3.523069  | -0.669500 | -1.046115 |
| C  | -2.323185 | 2.701336  | -0.339548 |
| H  | -1.309112 | 3.306756  | -2.133264 |
| H  | -1.170440 | 4.449107  | -0.772658 |
| H  | 1.309112  | 3.306756  | -2.133264 |
| H  | 1.170440  | 4.449107  | -0.772658 |
| H  | 2.178155  | 2.765053  | 0.744812  |
| H  | 3.266474  | 3.194313  | -0.604832 |
| H  | 3.483684  | 0.503811  | 0.744812  |
| H  | 4.399593  | 1.231693  | -0.604832 |
| H  | 4.438259  | -1.210922 | -0.772658 |
| H  | 3.518291  | -0.519654 | -2.133264 |
| H  | -3.266474 | 3.194313  | -0.604832 |
| H  | -2.178155 | 2.765053  | 0.744812  |
| O  | -0.000000 | -2.707309 | -0.752116 |
| O  | -2.388852 | -1.379204 | -0.637646 |
| O  | -2.344598 | 1.353654  | -0.752116 |
| C  | 2.341338  | -2.716317 | -1.046115 |
| C  | -1.177833 | -3.362605 | -0.339548 |
| C  | -2.341338 | -2.716317 | -1.046115 |
| C  | -3.523069 | -0.669500 | -1.046115 |
| C  | -3.501018 | 0.661269  | -0.339548 |
| H  | 1.305529  | -3.268864 | 0.744812  |
| H  | 1.133119  | -4.426006 | -0.604832 |
| H  | -1.305529 | -3.268864 | 0.744812  |
| H  | -1.133119 | -4.426006 | -0.604832 |
| H  | -2.209179 | -2.787102 | -2.133264 |
| H  | -3.267819 | -3.238184 | -0.772658 |
| H  | -3.518291 | -0.519654 | -2.133264 |
| H  | -4.438259 | -1.210922 | -0.772658 |
| H  | -4.399593 | 1.231693  | -0.604832 |
| H  | -3.483684 | 0.503811  | 0.744812  |
| H  | 3.267819  | -3.238184 | -0.772658 |
| H  | 2.209179  | -2.787102 | -2.133264 |
| Xe | -0.000000 | 0.000000  | 1.125201  |
| O  | 1.365893  | -0.788599 | 1.897808  |
| O  | -1.365893 | -0.788599 | 1.897808  |
| O  | -0.000000 | 1.577198  | 1.897808  |
